# Supplementary material
Source: MDPI journal article supplement (https://www.mdpi.com/2571-6182/6/3/40)
Supplement: s1 [file s1]

Archive with 1 entries (1 files):
- plasma-2543086-supplementary.pdf
